# Supplementary material for: Eu2+:CsCaX3 (X = Cl, Br, I) perovskite nanocrystals in glasses for blue light-emitting applications
Source: Royal Society of Chemistry journal article supplement (doi:10.1039/d3tc01704d), 2023-01-01
Supplement: d3tc01704d1.pdf [file d3tc01704d1.pdf]

## Supporting Information

### **Eu<sup>2+</sup>: CsCaX<sub>3</sub> (X=Cl, Br, I) perovskite nanocrystals in glasses for blue light-emitting applications**

Yudong Zhang<sup>1</sup>, Zhao Deng<sup>2</sup>, Kai Li<sup>1</sup>, Ying Ye<sup>1</sup>, Chao Liu<sup>1,\*</sup>

<sup>1</sup>State Key Laboratory of Silicate Materials for Architectures, Wuhan University of Technology, Wuhan 430070, China

<sup>2</sup>State Key Laboratory of Advanced Technology for Materials Synthesis and Processing, Wuhan University of Technology, Wuhan 430070, China

Corresponding author: [hite@whut.edu.cn](mailto:hite@whut.edu.cn)

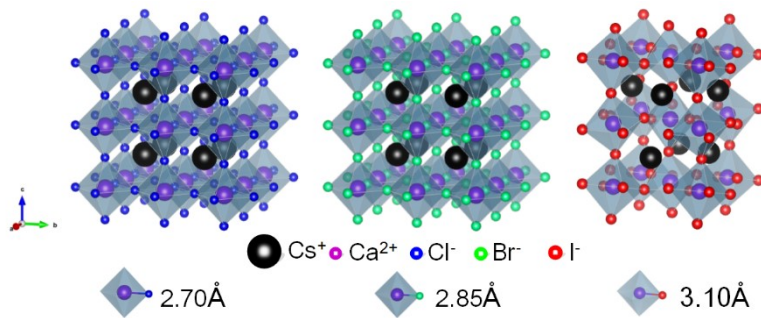

**Figure S1.** Crystal structures of  $\text{CsCaX}_3$ . The bond lengths between calcium and halides are extracted from Ref. 1.

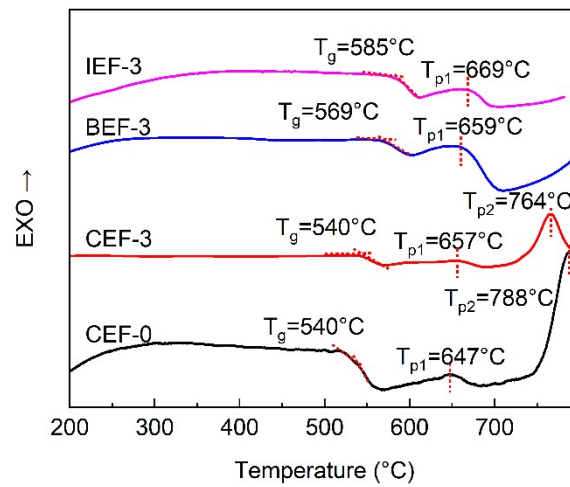

**Figure S2.** DSC curves of precursor glasses of undoped  $\text{CsCaCl}_3$  and  $\text{Eu}^{2+}$ :  $\text{CsCaX}_3$  glasses.  $T_g$  and  $T_p$  are glass transition temperature and crystallization temperature.

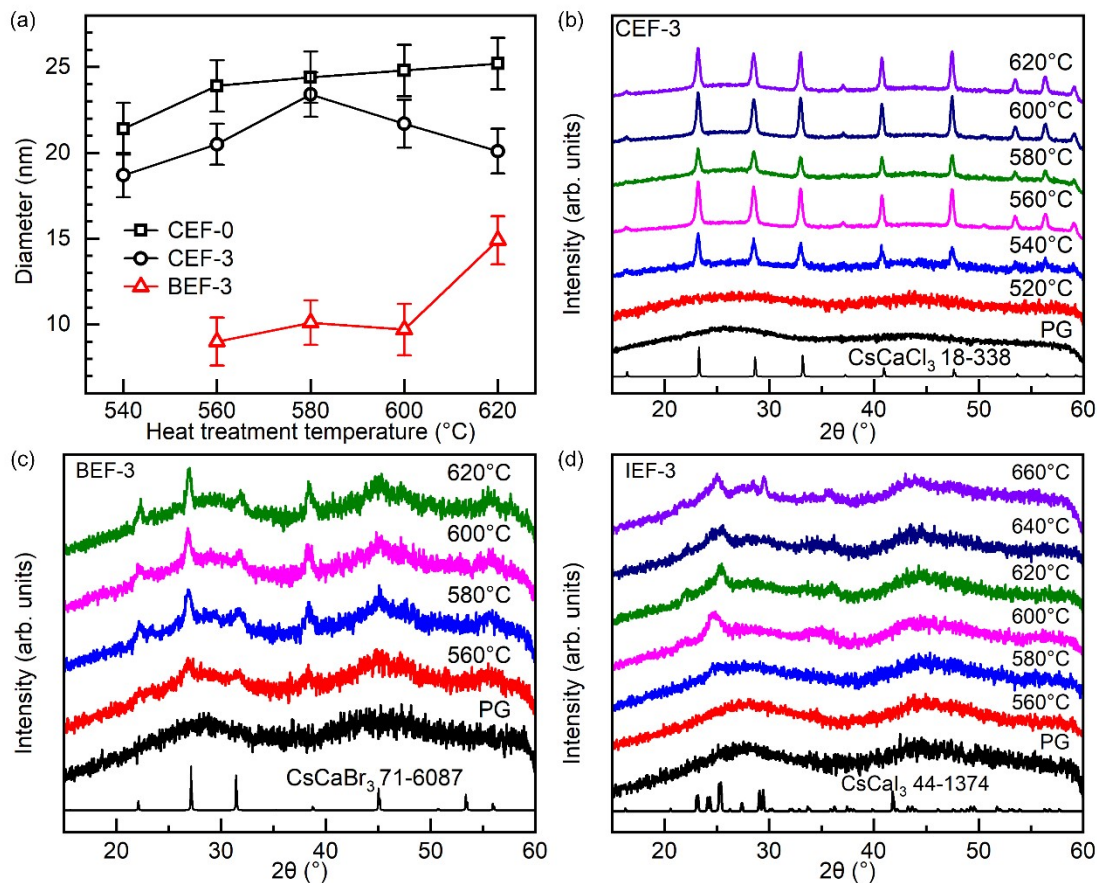

**Figure S3.** XRD patterns of CsCaCl<sub>3</sub> and Eu<sup>2+</sup>: CsCaX<sub>3</sub> embedded glasses. (a) Nanocrystal size calculated from Scherrer equation evolving with heat treatment temperatures. XRD patterns of (b) CEF-3, (c) BEF-3, (d) IEF-3 glass specimens with different heat-treatment temperature.

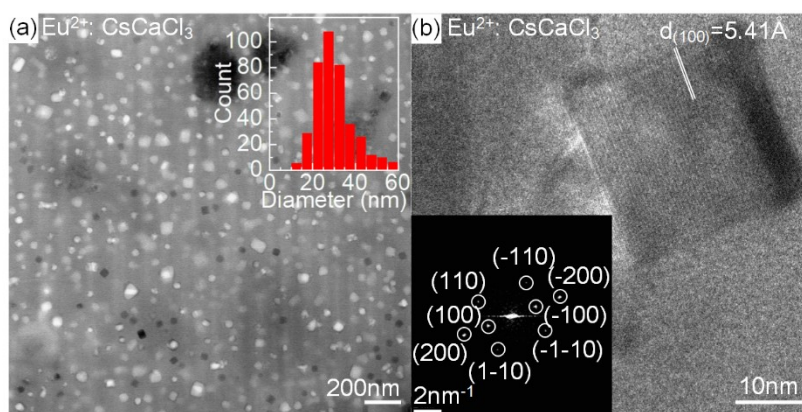

**Figure S4.** (a) STEM bright field image of CEF-3 glass heat-treated at 620 °C. Inset shows the statistical distribution of Eu<sup>2+</sup>: CsCaCl<sub>3</sub> nanocrystals. (b) HR-TEM of one Eu<sup>2+</sup>: CsCaCl<sub>3</sub> nanocrystal. Inset shows the corresponding FFT image.

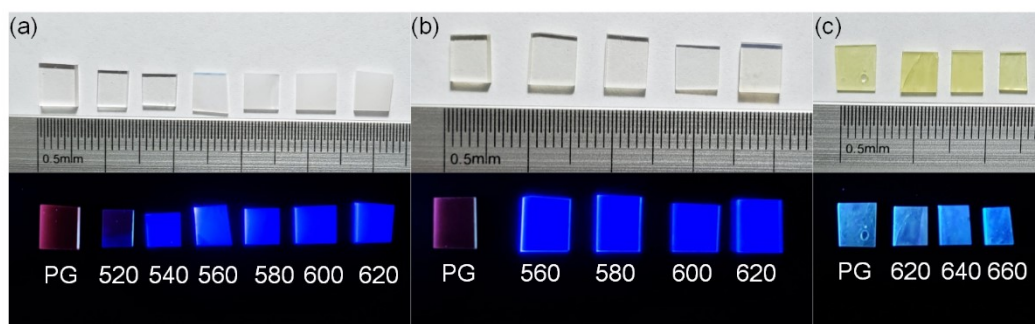

**Figure S5.** Photos of (a) CEF-3, (b) BEF-3, (c) IEF-3 glass specimens heat-treated at different temperatures. In each figure, the upper rolls show image recorded under room light, and the lower rolls show the images recorded under 365 nm UV light illumination (along the left-top direction). PG represents precursor glass, and the numbers represent the corresponding heat-treatment temperature ( $^{\circ}\text{C}$ ).

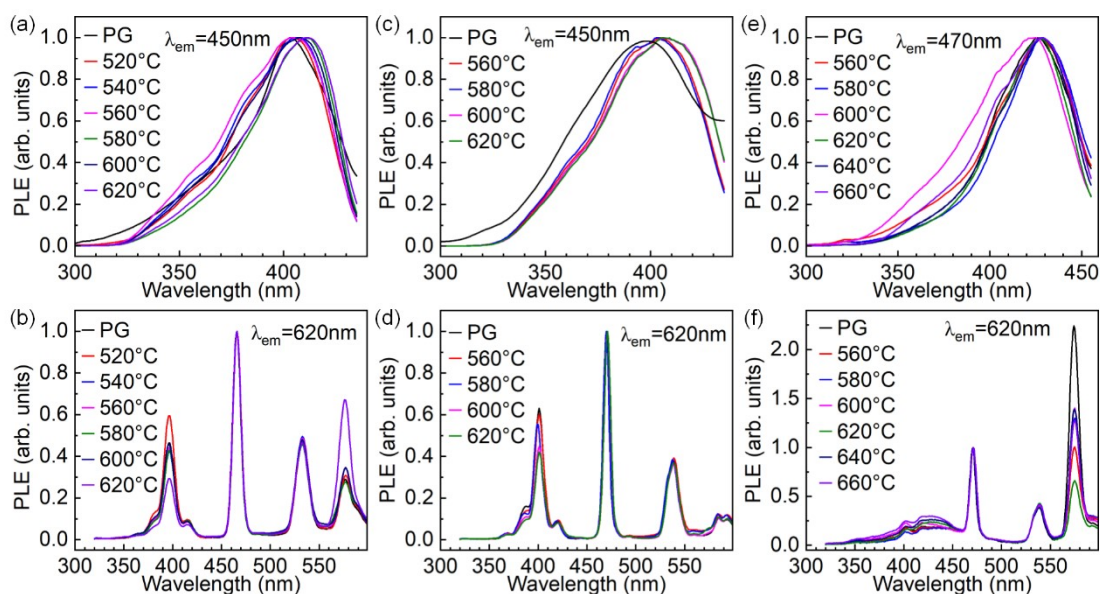

**Figure S6.** PLE spectra of CEF-3 glass specimens monitored at (a) 450 nm and (b) 620 nm, BEF-3 glass specimens monitored at (c) 450 nm and (d) 620 nm, and IEF-3 glass specimens monitored at (e) 450 nm and (f) 620 nm. PG represents the precursor glass and the numbers represent the heat-treatment temperature.

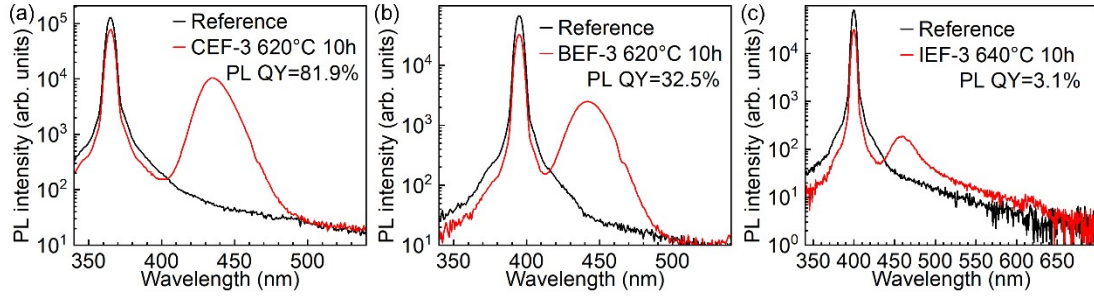

**Figure S7.** PL QY of (a) CEF-3 glass specimen heat-treated at 620 °C, (b) BEF-3 glass specimen heat-treated at 620 °C, and (c) IEF-3 glass specimen heat-treated at 640 °C.

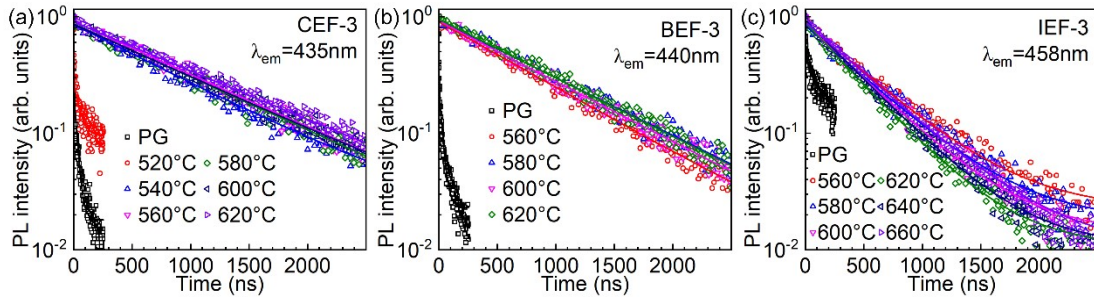

**Figure S8.** PL decay curves of (a) CEF-3, (b) BEF-3, (c) IEF-3 glass specimens. PG represents the precursor glass and the numbers inside represent the heat-treatment temperature.

**Note S1:** Fitting of PL decay curves.

The PL decay process of PG samples are fitted by bi-exponential function:

$$I(t) = A_1 \exp\left(-\frac{t}{\tau_1}\right) + A_2 \exp\left(-\frac{t}{\tau_2}\right) \quad \text{Eq. (S1)}$$

And the PL decay process of HT samples are fitted by single exponential function:

$$I(t) = A_1 \exp\left(-\frac{t}{\tau_1}\right) \quad \text{Eq. (S2)}$$

Where,  $A_i$  and  $\tau_i$  are the amplitudes and time constants of the decay processes, respectively.<sup>2</sup>

**Table S1.** Fitting results of PL decay curves of Eu<sup>2+</sup>: CsCaX<sub>3</sub> PNCs doped glass specimens.

| Sample       | A <sub>1</sub> | τ <sub>1</sub> (ns) | A <sub>2</sub> | τ <sub>2</sub> (ns) |
|--------------|----------------|---------------------|----------------|---------------------|
| CEF-3-PG     | 0.68           | 2.1                 | 0.22           | 26.2                |
| CEF-3-520 °C | 0.56           | 2.8                 | 0.19           | 48.9                |
| CEF-3-540 °C | 0.84           | 845.3               | --             | --                  |
| CEF-3-560 °C | 0.89           | 947.8               | --             | --                  |
| CEF-3-580 °C | 0.86           | 950.6               | --             | --                  |
| CEF-3-600 °C | 0.85           | 954.4               | --             | --                  |
| CEF-3-620 °C | 0.89           | 1024.3              | --             | --                  |
| BEF-3-PG     | 0.68           | 2.2                 | 0.22           | 29.0                |
| BEF-3-560 °C | 0.90           | 767.1               | --             | --                  |
| BEF-3-580 °C | 0.93           | 878.4               | --             | --                  |
| BEF-3-600 °C | 0.91           | 835.0               | --             | --                  |
| BEF-3-620 °C | 0.94           | 864.4               | --             | --                  |
| IEF-3-PG     | 0.37           | 5.7                 | 0.30           | 95.6                |
| IEF-3-560 °C | 0.86           | 493.4               | --             | --                  |
| IEF-3-580 °C | 0.82           | 477.7               | --             | --                  |
| IEF-3-600 °C | 0.87           | 444.0               | --             | --                  |
| IEF-3-620 °C | 0.88           | 401.2               | --             | --                  |
| IEF-3-640 °C | 0.92           | 421.0               | --             | --                  |
| IEF-3-660 °C | 0.89           | 482.6               | --             | --                  |

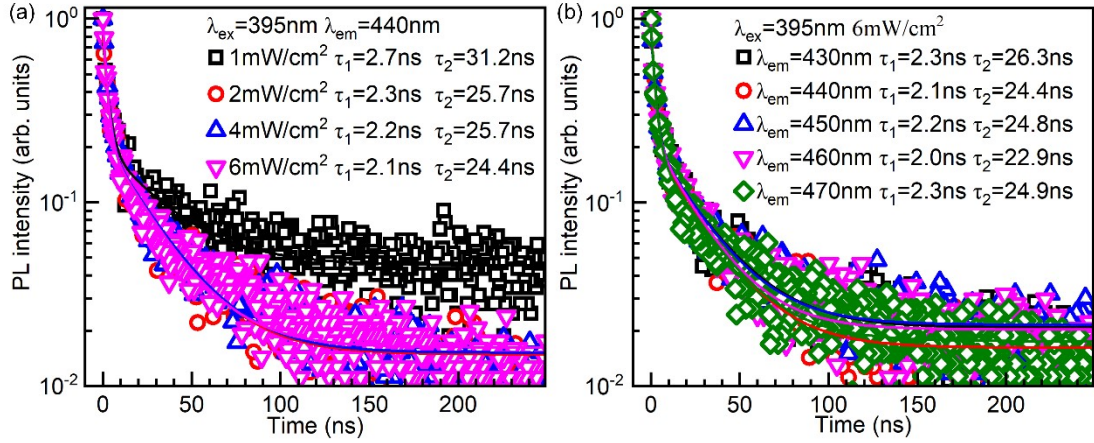

**Figure S9.** (a) Time-resolved PL spectra of CEF-3 PG specimen recorded with different excitation power density. (b) Time-resolved PL spectra of CEF-3 PG specimen recorded by monitoring at different emission wavelength.

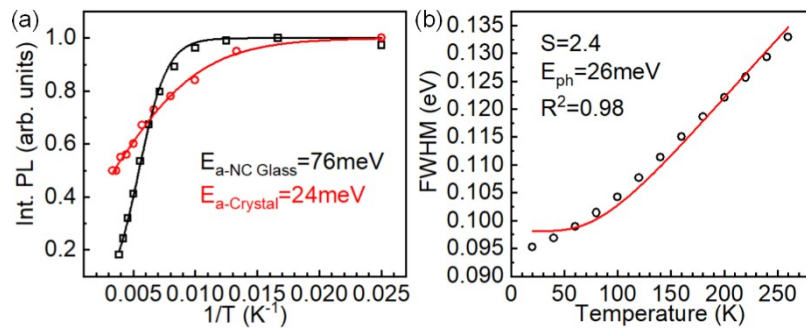

**Figure S10.** Dependence of (a) integrated PL intensity and (b) full width at half maximum (FWHM) on temperature of CEF-3 glass specimen heat-treated at  $620 \text{ }^\circ\text{C}$ . The red circles are the integrated PL intensity of CsCaCl<sub>3</sub> crystal extracted from Ref. 3. The solid lines in (a) and (b) are the fitting curves using the following Eq. S3 and Eq. S4.

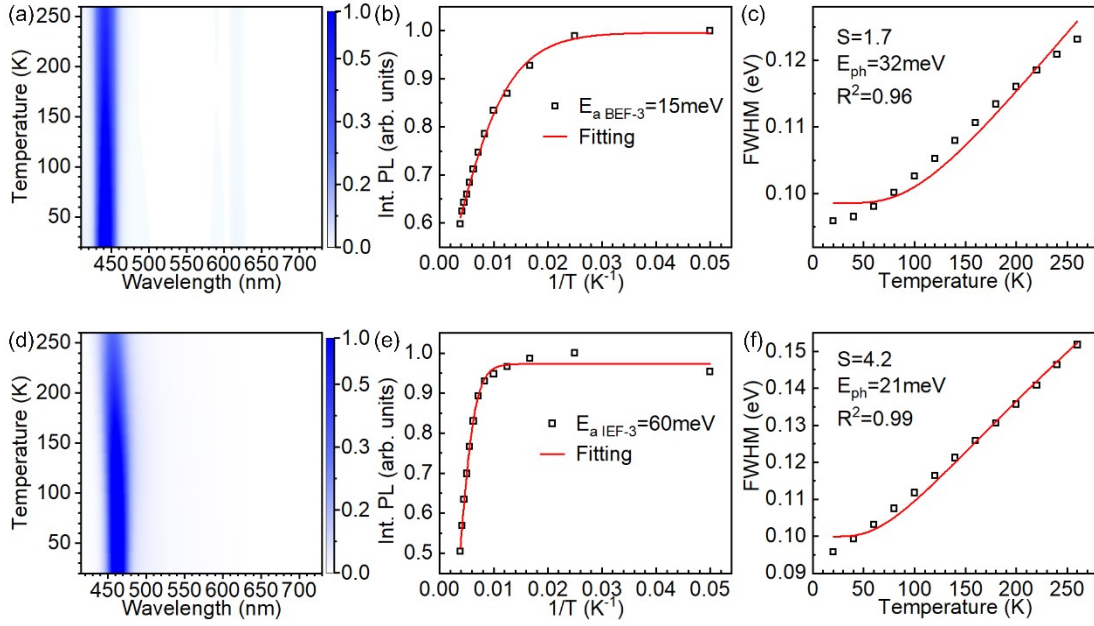

**Figure S11.** Temperature-dependent (a) PL spectra, (b) integrated PL intensities, and (c) full width at half maximum (FWHM) of BEF-3 specimen heat-treated at 620 °C for 10 h. Temperature-dependent (d) PL spectra, (e) integrated PL intensities, and (f) full width at half maximum (FWHM) of IEF-3 specimen heat-treated at 660 °C for 10 h. The solid lines in (b) and (e) are fitting curves using Eq. S3, and the solid lines in (c) and (f) are the fitting curves using Eq. S4.

**Note S2:** Fitting of temperature-dependent PL spectra.

Integrated PL intensity with temperature is fitted as<sup>4</sup>:

$$I(T) = \frac{I_0}{1 + A \exp\left(-\frac{E_a}{k_B T}\right)} \quad \text{Eq. (S3)}$$

Where,  $I_0$  is the PL intensity at 0 K,  $k_B$  is the Boltzmann constant,  $E_a$  is the activation energy.

The PL broadening with temperature is fitted as<sup>5</sup>:



$$FWHM(T) = 2.36\sqrt{S}\hbar\omega_{phonon} \sqrt{\coth\frac{\hbar\omega_{phonon}}{2k_B T}} \quad \text{Eq. (S4)}$$

Where,  $k_B$  is the Boltzmann constant,  $S$  is Huang-Rhys factor,  $\hbar$  is reduced Planck constant  $\omega_{phonon}$  is the phonon frequency, and  $T$  is the temperature.

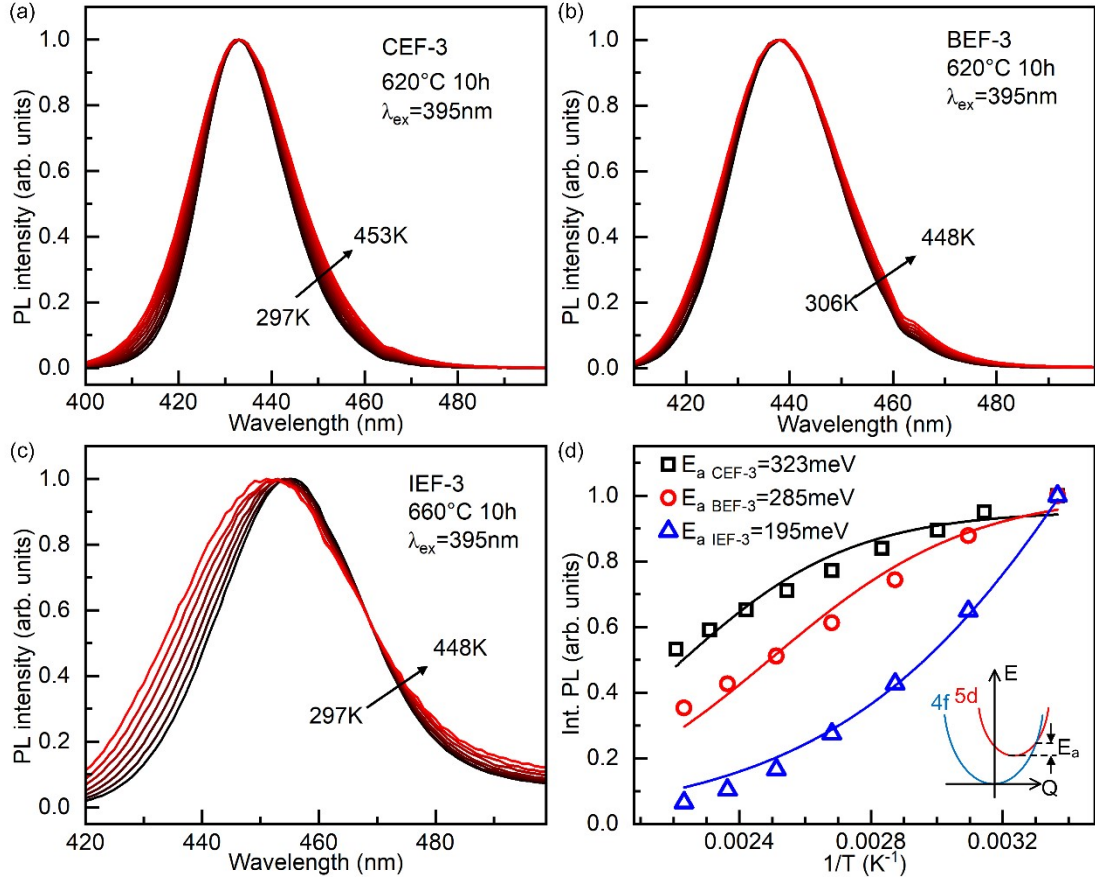

**Figure S12.** Normalized PL spectra of (a) CEF-3, (b) BEF-3, and (c) IEF-3 in the temperature range of 297-453 K. (d) Changes in integrated PL intensity of  $\text{Eu}^{2+}$ :  $\text{CsCaX}_3$  glass specimens with temperature (in the range of 297-453 K). Solid lines in (d) are the fitting curves using Eq. S3. Inset in (d) is the schematic illustration of configurational coordination diagram of  $\text{Eu}^{2+}$  doped in  $\text{CsCaX}_3$  nanocrystals embedded in glass.

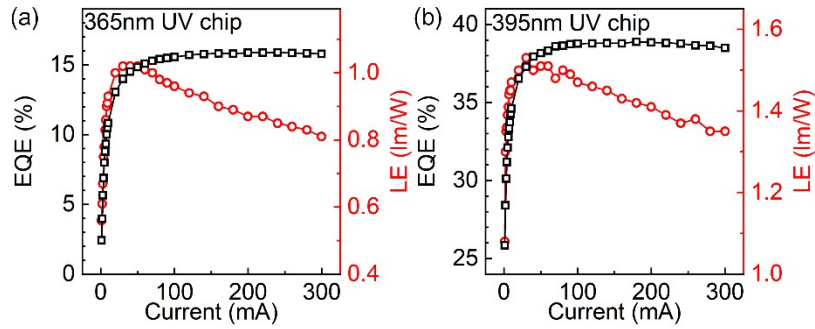

**Figure S13.** Changes in external quantum efficiency (EQE) and luminous efficacy (LE) of blue LEDs (based on CEF-3 glass specimen heat-treated at 620 °C) with driving currents of (a) 365 nm and (b) 395 nm UV LED chips.

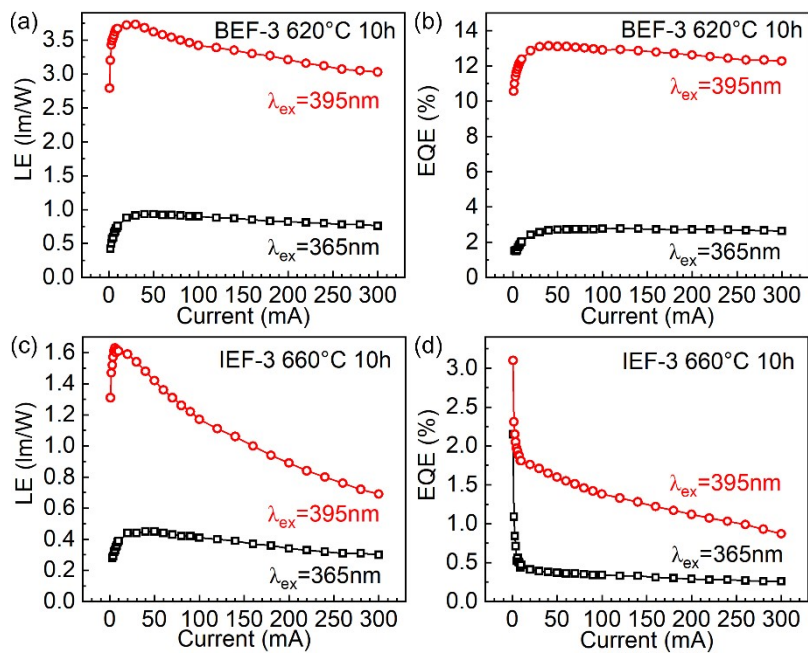

**Figure S14.** Changes in LE of (a) BEF-3 and (c) IEF-3 specimens with driving currents of 365 nm and 395 nm UV chips. Changes in EQE of (b) BEF-3 and (d) IEF-3 specimens with driving currents of 365 and 395 nm UV chips.

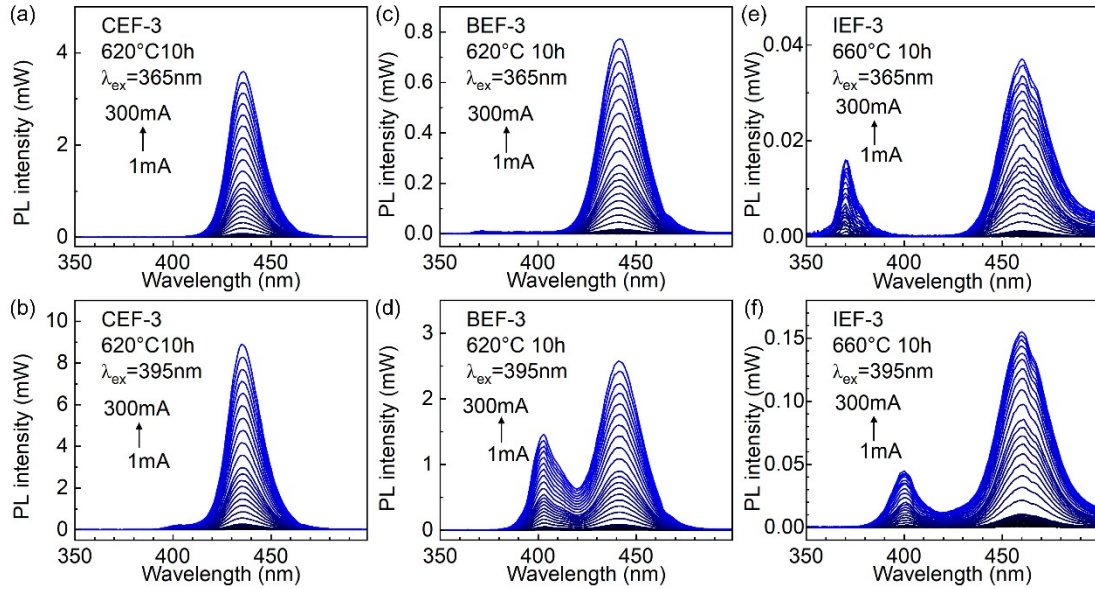

**Figure S15.** Changes in electroluminescence spectra of (a, b) CEF-3, (c, d) BEF-3, and (e, f) IEF-3 specimens. The driving currents of the 365 nm and 395 nm UV LED chips are tuned from 1 mA to 300 mA. CEF-3 and BEF-3 specimens are heat-treated at 620 °C for 10 h, and IEF-3 specimen is heat-treated at 660 °C for 10 h.

**Table S2.** Summary of deep blue LEDs with typical perovskite materials.

| Material                                         | Emission peak (nm) | FWHM (nm) | PL QY (%) | EQE (%) | LE (lm/W) | Ref.      |
|--------------------------------------------------|--------------------|-----------|-----------|---------|-----------|-----------|
| CsPbCl <sub>x</sub> Br <sub>3-x</sub> : Ni       | 470                | --        | 89        | 2.5     | --        | 6         |
| *CsPbBr <sub>3</sub>                             | 466                | 18        | 64        | --      | 3         | 7         |
| GA+CsPbBr <sub>2.5</sub> Cl <sub>0.5</sub>       | 457                | --        | 55        | 3.41    | --        | 8         |
| CsEuBr <sub>3</sub>                              | 448                | 30        | 70        | 6.5     | --        | 9         |
| BI <sub>2</sub> PbBr <sub>4</sub>                | 445                | 22        | 80        | 3.08    | --        | 10        |
| Cs <sub>3</sub> Cu <sub>2</sub> I <sub>5</sub>   | 445                | 63        | 87        | 1.12    | --        | 11        |
| FAPbBr <sub>3</sub> nanoplatelets                | 439                | 14        | 55        | 0.14    | --        | 12        |
| *FA <sub>3</sub> Bi <sub>2</sub> Br <sub>9</sub> | 437                | 65        | 52        | 3       | --        | 13        |
| CsEuCl <sub>3</sub>                              | 435                | 19        | 5         | --      | --        | 14        |
| Cs <sub>3</sub> Sb <sub>2</sub> Br <sub>9</sub>  | 408                | 70        | 51        | 0.206   | --        | 15        |
| *CsCaCl <sub>3</sub> :Eu                         | 435                | 22        | 81        | 24.6    | 5.2       | This work |
| *CsCaBr <sub>3</sub> :Eu                         | 440                | 25        | 32        | 13.1    | 3.7       | This work |

\*: Down-converted.

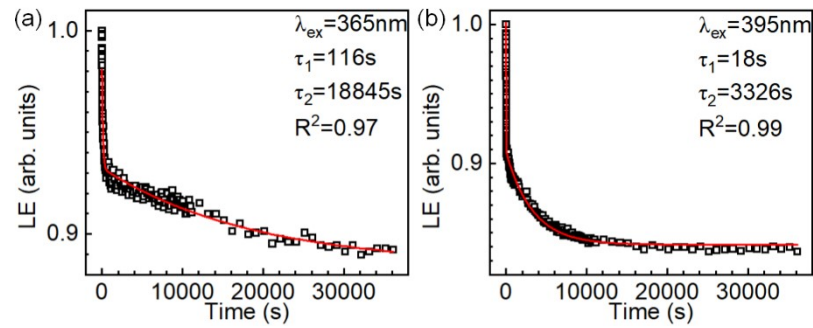

**Figure S16.** Time-dependent luminous efficacies of blue LEDs (based on CEF-3 glass specimen heat-treated at 620 °C) upon continuous excitation by (a) 365 nm and (b) 395 nm UV LED chips. Solid lines in the figure represent the fitting by bi-exponential function.

## References

- 1 M. Suta, W. Urland, C. Daul and C. Wickleder, *Phys. Chem. Chem. Phys.*, 2016, **18**, 13196-208.
- 2 Y. Ye, W. Zhang, Y. Zhang, K. Li, J. Han and C. Liu, *Chem. Eng. J.*, 2022, **445**,
- 3 M. Tyagi, M. Zhuravleva and C. L. Melcher, *J. Appl. Phys.*, 2013, **113**, 203504.
- 4 K. Wu, A. Bera, C. Ma, Y. Du, Y. Yang, L. Li and T. Wu, *Phys. Chem. Chem. Phys.*, 2014, **16**, 22476-22481.
- 5 W. Stadler, D. M. Hofmann, H. C. Alt, T. Muschik, B. K. Meyer, E. Weigel, G. Muller-Vogt, M. Salk, E. Rupp and K. W. Benz, *Phys. Rev. B Condens. Matter.*, 1995, **51**, 10619-10630.
- 6 G. Pan, X. Bai, W. Xu, X. Chen, Y. Zhai, J. Zhu, H. Shao, N. Ding, L. Xu, B. Dong, Y. Mao and H. Song, *ACS Appl. Mater. Interfaces*, 2020, **12**, 14195-14202.
- 7 S. Tu, M. Chen and L. Wu, *J. Mater. Chem. C*, 2021, **9**, 17444-17450.
- 8 Y. H. Zhou, C. Wang, S. Yuan, C. Zou, Z. Su, K. L. Wang, Y. Xia, B. Wang, D. Di, Z. K. Wang and L. S. Liao, *J. Am. Chem. Soc.*, 2022, **144**, 18470-18478.
- 9 J. Luo, L. Yang, Z. Tan, W. Xie, Q. Sun, J. Li, P. Du, Q. Xiao, L. Wang, X. Zhao, G. Niu, L. Gao, S. Jin and J. Tang, *Adv. Mater.*, 2021, **33**, e2101903.
- 10 S. Yan, W. Tian, H. Chen, K. Tang, T. Lin, G. Zhong, L. Qiu, X. Pan and W. Wang, *Adv. Opt. Mater.*, 2020, **9**, 2001709.
- 11 L. Wang, Z. Shi, Z. Ma, D. Yang, F. Zhang, X. Ji, M. Wang, X. Chen, G. Na, S. Chen, D. Wu, Y. Zhang, X. Li, L. Zhang and C. Shan, *Nano Lett.*, 2020, **20**, 3568-3576.
- 12 S. Peng, Z. Wen, T. Ye, X. Xiao, K. Wang, J. Xia, J. Sun, T. Zhang, G. Mei, H. Liu, B. Xu, X. Li, R. Chen, G. Xing, K. Wang and Z. Tang, *ACS Appl. Mater. Interfaces*, 2020, **12**, 31863-31874.
- 13 Y. Shen, J. Yin, B. Cai, Z. Wang, Y. Dong, X. Xu and H. Zeng, *Nanoscale Horiz.*, 2020, **5**, 580-585.
- 14 J. Huang, T. Lei, M. Siron, Y. Zhang, S. Yu, F. Seeler, A. Dehestani, L. N. Quan, K. Schierle-Arndt and P. Yang, *Nano Lett.*, 2020, **20**, 3734-3739.
- 15 Z. Ma, Z. Shi, D. Yang, F. Zhang, S. Li, L. Wang, D. Wu, Y. Zhang, G. Na, L. Zhang, X. Li, Y. Zhang and C. Shan, *ACS Energy Lett.*, 2019, **5**, 385-394.
